# Supplementary material for: Climate tipping point interactions and cascades: a review
Source: Copernicus journal article supplement (doi:10.5194/esd-15-41-2024), 2024-01-26
Supplement: Supplementary file 1 [file esd-15-41-2024-supplement.pdf]

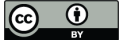

*Supplement of*

## **Climate tipping point interactions and cascades: a review**

**Nico Wunderling et al.**

*Correspondence to:* Nico Wunderling ([nico.wunderling@pik-potsdam.de](mailto:nico.wunderling@pik-potsdam.de)) and Anna S. von der Heydt ([a.s.vonderheydt@uu.nl](mailto:a.s.vonderheydt@uu.nl))

The copyright of individual parts of the supplement might differ from the article licence.

## **Possible example of nonlinear climate component interactions: Arctic sea ice loss leading to coastal permafrost erosion**

In this section, we discuss a recent example of a potential tipping cascade between parts of tipping elements, where the decline of Arctic sea ice deteriorates coastal permafrost through increased erosion. As even regional tipping elements can have substantial spatial extent it is possible that only a part of a tipping element or nonlinearly behaving region is affected. Here we  
5 discuss an example of such nonlinear climate component interaction, namely the impact of accelerating Arctic sea ice loss on coastal erosion in Siberian and North American permafrost regions.

Relic carbon-rich coastal shelf ice in Siberia and Alaska is exposed to the ocean and atmosphere (Irrgang et al., 2022). Currently, Arctic coastal erosion rates are of  $4 \text{ m a}^{-1}$ , peaking at  $25\text{-}50 \text{ m a}^{-1}$ , an order of magnitude higher than elsewhere in the world (Philipp et al., 2022). The shortened sea ice season exposes the ocean to winds and increases ocean wave fetch,  
10 leading to higher ocean waves that accelerate erosion levels (Nielsen et al., 2022; Meucci et al., 2023; Hošeková et al., 2021; Casas-Prat and Wang, 2020). The Siberian and Alaskan coasts transition to a higher erosion state, with a total retreat of 500-1000 m since the 1950s, and an accelerated retreat since the mid 2000's (Fig. 5) (Grigoriev, 2019).

The shelf primary production sustains about a third of Arctic production; coastal erosion provides the majority of nitrogen and phosphorus and a third of carbon (Terhaar et al., 2021). These fluxes can be much higher in the future, changing marine  
15 food-webs. Summer sea ice disappearance increases seasonal bloom and nutrient depletion in the ocean, nutrient inputs from rivers and coastal erosion alleviate the nutrient limitation (Oziel et al., 2022). The erosion is a risk to infrastructure, settlements and economy (Clare et al., 2022). The impact of erosion on ecosystems is medium to high with the medium to high uncertainty.

Change in sea ice is gradual (Notz, D. and SIMIP Community, 2020), however, storms can abruptly change sea ice on the shelves (Lukovich et al., 2021), leading to high waves and a destabilization of parts of the permafrost coast (Casas-Prat and  
20 Wang, 2020). The impact of coastal erosion on ecosystems is irreversible, as are socioeconomic impacts (Fritz et al., 2017). Furthermore, coastline collapse and permafrost degradation can release large amounts of carbon to the ocean and atmosphere (Vonk et al., 2012; Tarnocai et al., 2009).

In summary, this cascade operates as follows: (1) abrupt changes (a tipping point) in summer-autumn sea ice retreat from the coast leads to (2) increase in the waves, resulting in (3) abrupt increases in erosion rates (2-4 times higher) due to a wave  
25 undercut mechanism. Thus, (4) there is a cascading risk of large carbon releases to the Arctic ocean and atmosphere due to the coastal collapse. At the same time, Arctic coastal ecosystems would be impacted through increased nutrients and other terrigenous matter fluxes as well as local communities and economies (fisheries and infrastructure collapse) (Irrgang et al., 2022; Nielsen et al., 2022).

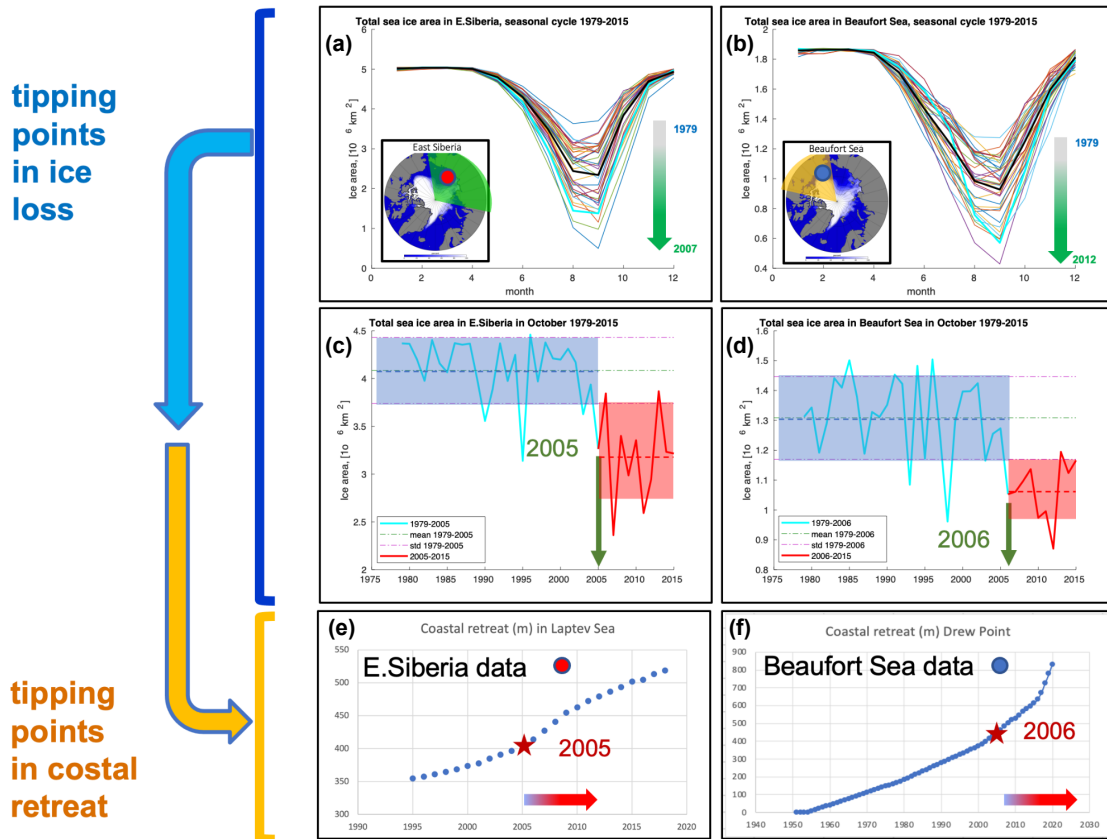

**Figure S 1.** Cascade between different elements of the Arctic climate system: sea ice and coastal permafrost erosion. (a,b) Sea ice area seasonal cycle for the 1979-2015 in Siberia and Beaufort Sea. (c,d) Time series of the October sea ice area with a tipping point, defined through changes in the mean, standard deviation and linear trends; the two ice states are marked by the cyan and red lines. (e,f) Coastal retreat in these regions. Stars show potential tipping points. The mechanism of transition, linking the sea ice retreat to the increased waves and accelerated coastal erosion, suggests a cascade, acting from the abrupt changes in the ocean and cryosphere to the changes of state in the coastal retreat and ecosystem.

## Supplementary references

- 30 Casas-Prat, M. and Wang, X. L.: Projections of extreme ocean waves in the Arctic and potential implications for coastal inundation and erosion, *Journal of Geophysical Research: Oceans*, 125, e2019JC015 745, 2020.
- Clare, M., Yeo, I., Bricheno, L., Aksenov, Y., Brown, J., Haigh, I., Wahl, T., Hunt, J., Sams, C., Chaytor, J., et al.: Climate change hotspots and implications for the global subsea telecommunications network, *Earth-Science Reviews*, 237, 104 296, 2022.
- Fritz, M., Vonk, J. E., and Lantuit, H.: Collapsing arctic coastlines, *Nature Climate Change*, 7, 6–7, 2017.
- 35 Grigoriev, M.: Coastal retreat rates at the Laptev Sea key monitoring sites, PANGAEA. doi: <https://doi.org/10.1594/PANGAEA>, 905519, 2019.
- Hošeková, L., Eidam, E., Panteleev, G., Rainville, L., Rogers, W. E., and Thomson, J.: Landfast ice and coastal wave exposure in northern Alaska, *Geophysical Research Letters*, 48, e2021GL095 103, 2021.
- Irrgang, A. M., Bendixen, M., Farquharson, L. M., Baranskaya, A. V., Erikson, L. H., Gibbs, A. E., Ogorodov, S. A., Overduin, P. P., Lantuit, H., Grigoriev, M. N., et al.: Drivers, dynamics and impacts of changing Arctic coasts, *Nature Reviews Earth & Environment*, 3, 39–54, 2022.
- 40 Lukovich, J. V., Stroeve, J. C., Crawford, A., Hamilton, L., Tsamados, M., Heorton, H., and Massonnet, F.: Summer extreme cyclone impacts on Arctic sea ice, *Journal of Climate*, 34, 4817–4834, 2021.
- Meucci, A., Young, I. R., Hemer, M., Trenham, C., and Watterson, I. G.: 140 years of global ocean wind-wave climate derived from CMIP6 ACCESS-CM2 and EC-Earth3 GCMs: Global trends, regional changes, and future projections, *Journal of Climate*, 36, 1605–1631, 2023.
- 45 Nielsen, D. M., Pieper, P., Barkhordarian, A., Overduin, P., Ilyina, T., Brovkin, V., Baehr, J., and Dobrynin, M.: Increase in Arctic coastal erosion and its sensitivity to warming in the twenty-first century, *Nature Climate Change*, 12, 263–270, 2022.
- Notz, D. and SIMIP Community: Arctic sea ice in CMIP6, *Geophysical Research Letters*, 47, e2019GL086 749, 2020.
- Oziel, L., Schourup-Kristensen, V., Wekerle, C., and Hauck, J.: The pan-Arctic continental slope as an intensifying conveyor belt for nutrients in the central Arctic Ocean (1985–2015), *Global Biogeochemical Cycles*, 36, e2021GB007 268, 2022.
- 50 Philipp, M., Dietz, A., Ullmann, T., and Kuenzer, C.: Automated extraction of annual erosion rates for Arctic permafrost coasts using Sentinel-1, deep learning, and change vector analysis, *Remote Sensing*, 14, 3656, 2022.
- Tarnocai, C., Canadell, J. G., Schuur, E. A., Kuhry, P., Mazhitova, G., and Zimov, S.: Soil organic carbon pools in the northern circumpolar permafrost region, *Global Biogeochemical Cycles*, 23, 2009.
- 55 Terhaar, J., Lauerwald, R., Regnier, P., Gruber, N., and Bopp, L.: Around one third of current Arctic Ocean primary production sustained by rivers and coastal erosion, *Nature Communications*, 12, 169, 2021.
- Vonk, J. E., Sánchez-García, L., Van Dongen, B., Alling, V., Kosmach, D., Charkin, A., Semiletov, I. P., Dudarev, O. V., Shakhova, N., Roos, P., et al.: Activation of old carbon by erosion of coastal and subsea permafrost in Arctic Siberia, *Nature*, 489, 137–140, 2012.
